# Supplementary material for: Spinal Orthoses in the Treatment of Osteoporotic Thoracolumbar Vertebral Fractures in the Elderly: A Systematic Review With Quantitative Quality Assessment
Source: PubMed Central journal article supplement — Global Spine J. 2023 Apr 21;13(1 Suppl):59S–72S. doi: 10.1177/21925682221130048 (PMC10177312; doi:10.1177/21925682221130048), 2023-04-21
Supplement: sj-pdf-1-gsj-10.1177_21925682221130048.pdf [file sj-pdf-1-gsj-10.1177_21925682221130048.pdf]

| First Author        | Publication Year | Journal                                                  | Impact Factor | Inclusion                                                                                                                                                                                              | Exclusion                                                                                                                                                                                                                                                                                                                                                            | Country of Performance | Financial Conflict |
|---------------------|------------------|----------------------------------------------------------|---------------|--------------------------------------------------------------------------------------------------------------------------------------------------------------------------------------------------------|----------------------------------------------------------------------------------------------------------------------------------------------------------------------------------------------------------------------------------------------------------------------------------------------------------------------------------------------------------------------|------------------------|--------------------|
| Tetsuya Abe         | 2018             | Archives of Osteoporosis                                 | 2.6           | Age ≥60 years<br>Acute onset back and/or low back pain due to single-level OVF fracture caused by minor or nontraumatic events<br>Agreement for admission to treat back pain.                          | Pathological fracture due to malignancy<br>Non-ambulatory before the onset of the fracture<br>Severe dementing disorder to impede bed rest<br>Refusal of admission to treat back pain.                                                                                                                                                                               | Japan                  | -                  |
| Yannis Dionysiots   | 2015             | Prosthetics and Orthotics International                  | 1.9           | Spinal Osteoporosis (≥1 OVF) thoracic/lumbar spine caused by a non-serious injury or accident<br>OVF with radiographic reduction of ≥20% VH<br>Women with a kyphosis angle >55° in lateral spine views | Bone metabolic disorders<br>Serious degenerative diseases (e.g. severe osteoarthritis, scoliosis, and tumors)                                                                                                                                                                                                                                                        | Greece                 | -                  |
| Masatoshi Hoshino   | 2013             | SPINE                                                    | 3.5           | Acute back pain<br>Deformed VB on radiograms<br>Abnormal intensity within the VB on MRI<br>Low energy injury mechanism                                                                                 | Pathological fractures                                                                                                                                                                                                                                                                                                                                               | Japan                  | -                  |
| Eva Jacobs          | 2019             | Clinical Interventions in Aging                          | 4.5           | Female sex<br>Age ≥55 years<br>Symptomatic OVF (3 weeks old, visible on thoracolumbar radiography)<br>Ambulatory                                                                                       | Unstable fractures<br>Previous OVFs<br>Not fully ambulatory<br>Need for walking aids<br>Active cancer<br>Body weight >135kg<br>>2 OVF from T10 to L2                                                                                                                                                                                                                 | Netherlands            | -                  |
| Tsuyoshi Kato       | 2019             | Journal of Clinical Medicine                             | 4.2           | Age 65-85 years<br>fresh OVF between T10 and L2 within four weeks of injury                                                                                                                            | Previous spinal surgery<br>Neurological deficits<br>Inability to complete questionnaires<br>Serious comorbid conditions (e.g. cancer, infection)                                                                                                                                                                                                                     | Japan                  | -                  |
| Ho-Joong Kim        | 2014             | The Journal of Bone and Joint Surgery                    | 5.3           | Age ≥ 50 years<br>Presence of acute back pain caused by a single-level OVF within three days of minor trauma                                                                                           | >2 OVF<br>Pathological fracture<br>Neurologic deficit<br>Not walking before fracture<br>History of previous injury or surgery at the fractured level<br>Inability to complete the questionnaires                                                                                                                                                                     | South Korea            | Hanlim Pharm       |
| Meng Li             | 2015             | Prosthetics and Orthotics International                  | 1.9           | Age ≥55 years<br>Female<br>Clinical diagnosis of OVF with radiographs.<br>Back pain secondary to OVF<br>Affected vertebrae between T1-L5                                                               | Premorbid (bed-bound, previous spine surgery, pathological fracture)<br>Dementia/cognitive impairment<br>Patients with neurological deficits<br>Secondary to osteoporotic fracture<br>Severe spinal degenerative changes                                                                                                                                             | China                  | -                  |
| Mei-Yun Liaw        | 2009             | Journal of Back and Musculoskeletal Rehabilitation       | 1.4           | Age 60-85 year<br>OVF<br>Visiting an osteoporotic outpatient clinic of the rehabilitation department of our hospital                                                                                   | Cognitive impairment<br>Neuromuscular disease<br>Uncorrectable visual deficits<br>Vertigo<br>Altered sensation<br>Decreased muscle power<br>Joint contracture<br>Leg discrepancy or deformity<br>Joint replacement in the lower extremities<br>Severe fixed kyphosis<br>Peripheral neuropathy<br>Previous stroke<br>Parkinson's disease<br>Receiving sedative agents | Taiwan                 | -                  |
| Luigi Meccariello   | 2017             | Aging Clinical and Experimental Research                 | 3.6           | Age ≥60 years or older<br>Acute back pain caused by single level OVF<br>OVF between T6 to L3 due to minor trauma or strain<br>No neurological symptoms                                                 | >1 or previous OVF<br>Bone metabolic disorders<br>Pathological fracture,<br>Neurological deficits<br>Inability to walk<br>Inability to complete questionnaires<br>Severe lung diseases<br>Smoking >10 cigarettes/day                                                                                                                                                 | Italy                  | -                  |
| Kenji Murata        | 2012             | Journal of Neurosurgery-Spine                            | 3.6           | Acute back pain (≥1 week after onset)<br>Thoracolumbar OVF<br>Verified by MRI                                                                                                                          | Refusal of treatment/rigid external support<br>Neurological deficits                                                                                                                                                                                                                                                                                                 | Japan                  | -                  |
| Michael Pfeifer     | 2004             | American Journal of Physical Medicine and Rehabilitation | 2.2           | Age ≥60 years<br>≥1 clinical OVF caused by osteoporosis<br>KA of 60° measured by stereophotomorphometry                                                                                                | Bone metabolic disorders<br>Severe degenerative diseases of the spine (e.g. osteoarthritis, scoliosis, and malignancies)                                                                                                                                                                                                                                             | Germany                | Medi-Bayreuth      |
| Michael Pfeifer     | 2011             | American Journal of Physical Medicine and Rehabilitation | 2.2           | Age ≥60 years<br>≥1 OVF caused by osteoporosis within the last 6 months<br>KA >60° as measured by stereophotomorphometry                                                                               | Bone metabolic disorders<br>Severe degenerative diseases of the spine (e.g. osteoarthritis, scoliosis, and malignancies)                                                                                                                                                                                                                                             | Germany                | Medi-Bayreuth      |
| Gitte Hoff Valentin | 2014             | Prosthetics and Orthotics International                  | 1.9           | women aged ≥50 years<br>≥ 1 thoracic/lumbar OVF verified by X-ray<br>OVF with radiographic reduction of ≥20% VH<br>Persistent back pain lasting ≥3 months prior to baseline                            | Severe exacerbation of back pain within 6 weeks prior to baseline<br>New onset of X-ray verified OVF<br>Hyperparathyroidism<br>Hyperthyroidism<br>Major comorbidities (e.g. malignancies of the spine, neurological diseases, severe congenital scoliosis)<br>Inability to put on Spinomed III                                                                       | Denmark                | -                  |
